# Supplementary material for: Bmal1 Regulates Prostate Growth via Cell-Cycle Modulation
Source: MDPI journal article supplement (doi:10.3390/ijms231911272), 2022-09-24
Supplement: s1 [file s1]

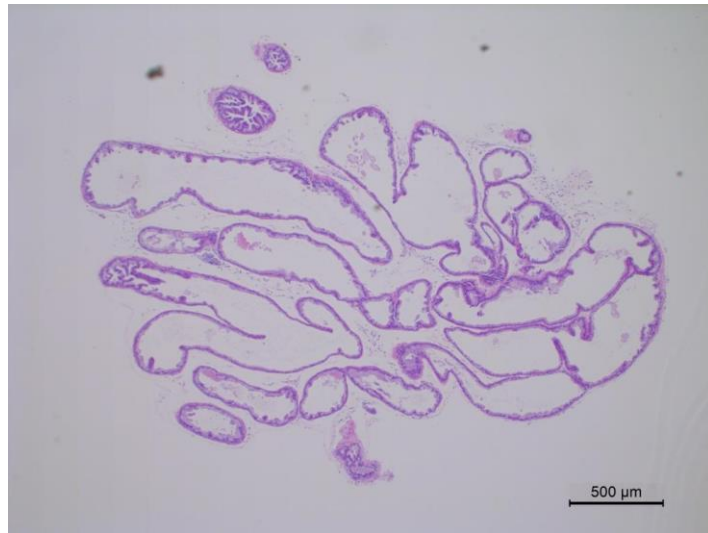

*Bmal1<sup>fx/fx</sup>*

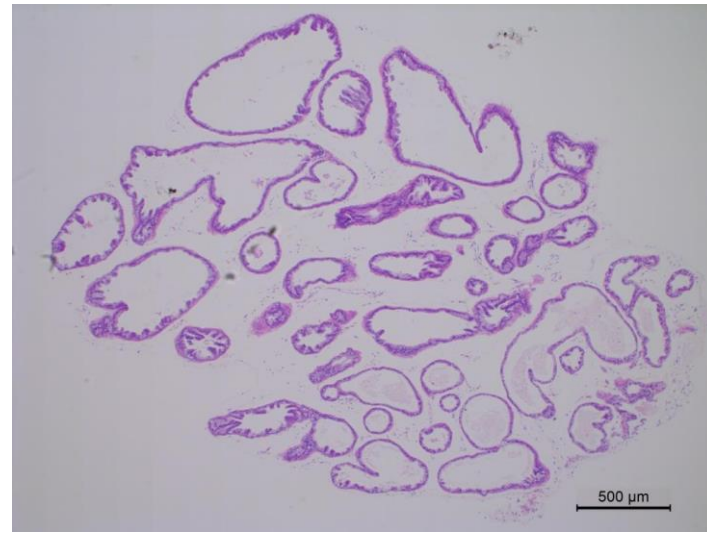

*Bmal1<sup>fx/fx</sup> - Cre*

Figure S1: Histological analysis of ventral prostates in *Bmal1<sup>fx/fx</sup>* mice and *PbsnCre<sup>+</sup>; Bmal1<sup>fx/fx</sup>* mice. Sections were stained with hematoxylin and eosin (H&E).

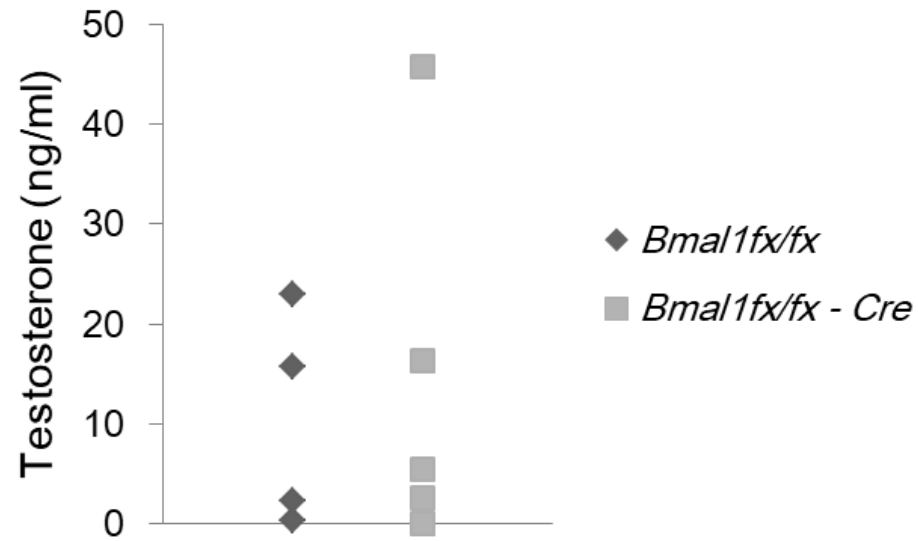

Figure S2: Serum testosterone concentration of *PbsnCre<sup>+</sup>; Bmal1<sup>fx/fx</sup>* mice (N=5) and *Bmal1<sup>fx/fx</sup>* mice (N=4).

A

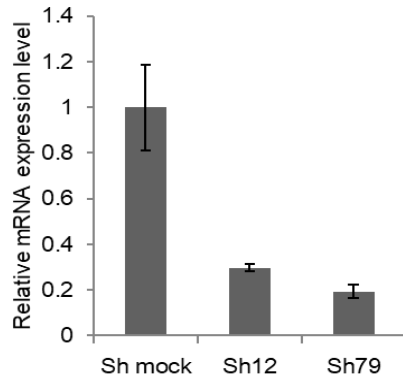

B

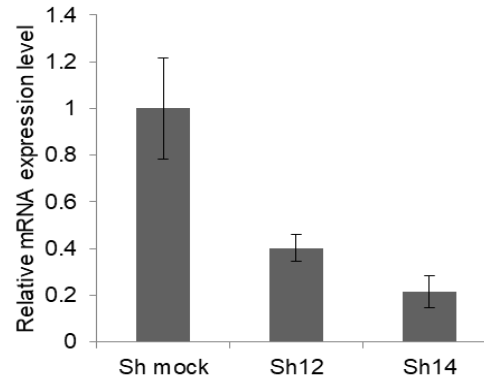

Figure S3: The levels of *BMAL1* expression in *BMAL1*-knockdown cells. (A) prostate epithelial cells, RWPE-1. (B) prostate stromal cells, WPMY-1.

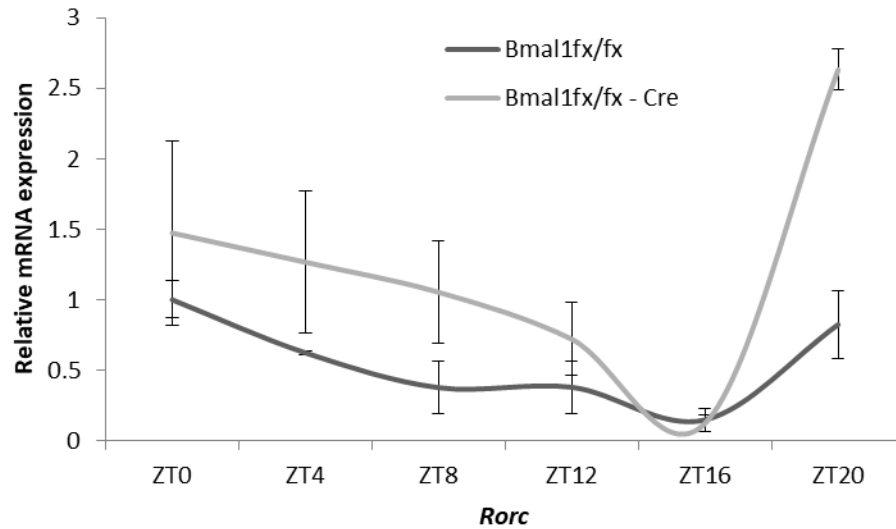

Figure S4: Oscillation of *Rorc* mRNA in *Bmal1<sup>fx/fx</sup>* mice and increased expression of *Rorc* mRNA in mouse prostates from p*Bmal1* KO mice. Oscillation of *Rorc* in mouse dorsolateral prostates under LD condition ( $N=3$  for each time point). P-values with Cosinor analysis in *Rorc* were 0.091 in *Bmal1<sup>fx/fx</sup>* mice and 0.366 in p*Bmal1* KO mice, respectively.

Figure 1B

BMAL1

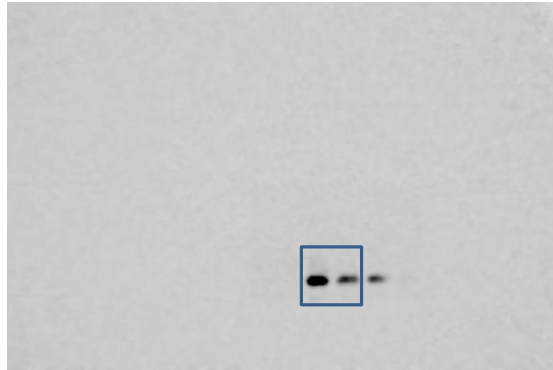

ACTB

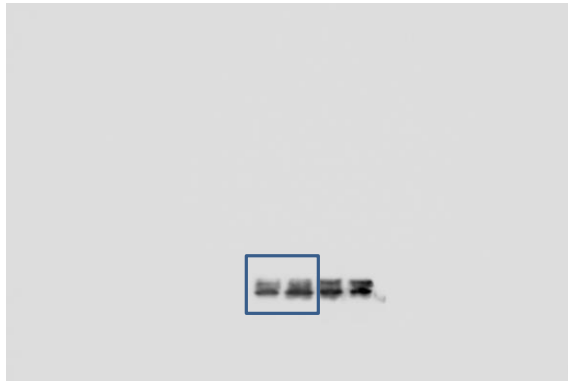

Figure 5A

p21

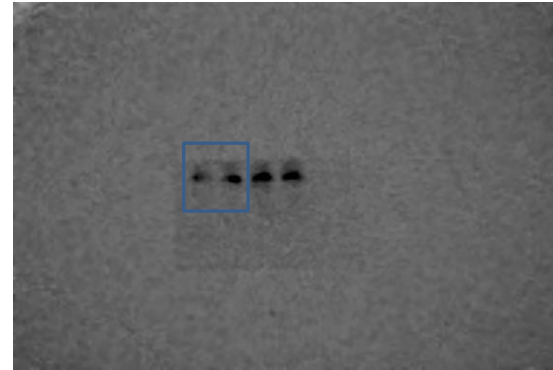

ACTB

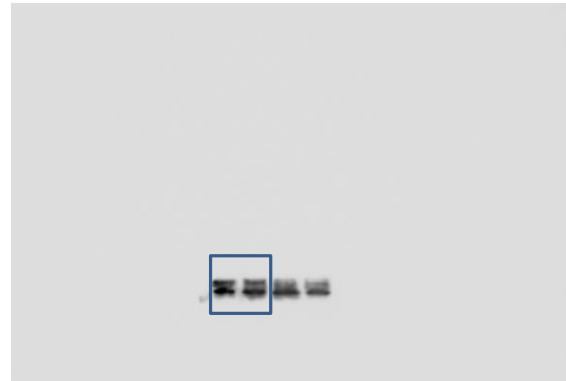

Figure S5: Full-length unedited blots for Figure 1B and 5A

Table S1. Primers for real-time quantitative PCR.

| Species | Gene name     |         | Primer sequences           | Amplicon size (b.p.) |
|---------|---------------|---------|----------------------------|----------------------|
| Human   | <i>Bmal1</i>  | Forward | GAAGACAACGAACCAGACAATGAG   | 86                   |
|         |               | Reverse | GGTTGTGGAACACTACATGAGAATGC |                      |
|         | <i>GAPDH</i>  | Forward | GAAGGTGAAGGTCGGAGTC        | 226                  |
|         |               | Reverse | GAAGATGGTGATGGGATTTC       |                      |
| Mouse   | <i>Bmal1</i>  | Forward | CCAAGAAAGTATGGACACAGACAAA  | 81                   |
|         |               | Reverse | GCATTCTTGATCCTTCCTTGGT     |                      |
|         | <i>Cdkn1a</i> | Forward | GCAGACCAGCCTGACAGATTT      | 211                  |
|         |               | Reverse | GAGAGGGCAGGCAGCGTAT        |                      |
|         | <i>Rorc</i>   | Forward | CGACTGGAGGACCTTCTACG       | 94                   |
|         |               | Reverse | GCTCCCACATCTCCCACA         |                      |
|         | <i>Rn18S</i>  | Forward | ACTCAACACGGGAAACCTCA       | 123                  |
|         |               | Reverse | AACCAGACAAATCGCTCCAC       |                      |
